# Supplementary material for: Epac2 in midbrain dopamine neurons contributes to cocaine reinforcement via enhancement of dopamine release
Source: eLife. 2022 Aug 22;11:e80747. doi: 10.7554/eLife.80747 (PMC9436413; doi:10.7554/eLife.80747)
Supplement: Figure 1—source data 1. [file elife-80747-fig1-data1.xlsx]

## Sheet: Figure 1
Figure 1A	FR1								Figure 1B	FR1				Figure 1C	FR1				Figure 1D	FR1				Figure 1E	Multiple dose								Figure 1F	Multiple dose								Figure 1G					Figure 1H
	Training session	Active nose pokes		Inactive nose pokes		Cocaine infusions				Active nose pokes					Inactive nose pokes					Cocaine infusion					Cocaine (mg/kg/infusion)	ESI-05 0 mg/kg		ESI-05 3.3 mg/kg		ESI-05 10 mg/kg				Cocaine (mg/kg/infusion)	ESI-05 0 mg/kg		ESI-05 3.3 mg/kg		ESI-05 10 mg/kg				PR cocaine infusions					PR breakpoint
		Mean	S.E.	Mean	S.E.	Mean	S.E.			ESI-05 (mg/kg)					ESI-05 (mg/kg)					ESI-05 (mg/kg)						Mean	S.E.	Mean	S.E.	Mean	S.E.				Mean	S.E.	Mean	S.E.	Mean	S.E.			ESI-05 (mg/kg)					ESI-05 (mg/kg)
	1	17.2222	6.00248	7.47059	1.51734	13.7778	3.90956			0	3.3	10			0	3.3	10			0	3.3	10			0	3.22222	1.09008	3.125	1.09279	1.625	1.08459			0	0	0	0	0	0	0			0	3.3	10			0	3.3
	2	25.0556	5.96365	6	1.36931	20.9444	3.75341			50	37	18			12	3	3			50	36	18			0.03125	7.33333	2.63523	6.5	1.21008	2.25	0.7962			0.03125	0.22917	0.08235	0.20313	0.03781	0.07031	0.02488			7	4	4			12	5
	3	34.0556	7.21856	4.22222	0.97201	25.8333	4.84751			45	34	28			20	11	10			43	22	28			0.0625	18.8889	2.43496	12	1.65831	6.25	1.75			0.0625	1.18056	0.15218	0.75	0.10364	0.39063	0.10938			8	7	6			16	13
	4	51.8333	5.49881	8	1.25733	39.3333	3.61641			42	52	14			1	5	7			47	45	14			0.125	26	1.69148	14.5	0.88641	9.25	0.75			0.125	3.25	0.21144	1.8125	0.1108	1.15625	0.09375			9	7	4			20	13
	5	60.7778	5.21721	5.94444	1.10398	47.9444	3.09382			69	17	13			10	16	22			40	15	13			0.25	17.1111	0.53863	13.5	0.96362	9.625	0.7304			0.25	4.27778	0.13466	3.375	0.24091	2.40625	0.1826			10	6	3			25	10
	6	62.8889	5.23992	5	1.23669	50.0556	3.07049			75	35	17			2	20	10			58	23	17			0.5	10	0.40825	9	0.26726	7.5	0.59761			0.5	5	0.20412	4.5	0.13363	3.75	0.29881			8	8	7			16	16
	7	67.7778	3.947	5.3125	1.22379	52.5	2.41489			58	38	25			11	19	6			52	29	18			1	5.66667	0.2357	5	0.26726	4.5	0.18898			1	5.66667	0.2357	5	0.26726	4.5	0.18898			10	7	7			25	13
	8	65.5556	4.43193	7.875	1.47726	49.7222	2.22259			57	35	11			12	4	1			36	29	7																					8	7	6			16	13
	9	67.2778	2.96141	6.3125	1.22719	51.9444	1.78862			50	48	37			1	2	1			42	33	27																					12	7	4			38	13
	10	66.3333	4.36265	8.3125	1.99106	53.2778	2.0305			64	49	34			7	7	14			50	43	31																					7	6	5			13	10
										52	43	26			14	13	4			41	48	18																					7	9	5			16	20
										84	56	37			5	11	3			64	45	25																					9					20
										73					22					59
										84					3					60
[truncated: 1 more columns]

## Sheet: Figure1-figure supplement 1
Mouse #1	Time of infusions (min)					Mouse #2	Time of infusions (min)					Mouse #3	Time of infusions (min)
	0mg/kg	3.3mg/kg	10mg/kg	ESI-05			0mg/kg	3.3mg/kg	10mg/kg	ESI-05			0mg/kg	3.3mg/kg	10mg/kg	ESI-05
	2.39233	2.38233	11.014				0.03733	6.75567	2.464				1.109	13.1123	13.2423
	5.13067	11.5807	15.949				0.529	10.334	23.9473				6.21067	14.4657	20.614
	6.454	14.6323	18.769				2.42567	24.6657	24.4907				8.97233	15.8357	34.064
	13.0807	17.679	27.8057				6.644	25.804	25.5757				10.4273	26.3907	92.9157
	15.5023	21.2207	31.7023				9.02733	26.9657	35.6123				17.0073	32.5757	105.717
	17.619	24.1923	36.869				15.4207	27.7807	53.234				18.714	37.7857	109.234
	23.2457	25.8423	38.6807				24.1923	28.0107	59.519				20.0573	38.819	118.234
	23.8723	34.784	53.7457				24.9773	60.434	70.7623				25.699	40.2923	147.341
	28.234	44.7723	55.349				31.0207	62.604	71.639				26.464	62.1407	165.234
	29.029	46.0573	80.6457				36.199	62.9423	72.7957				28.1807	74.9123
	34.6273	49.139	82.7473				41.5107	66.1457	82.1123				29.6273	85.234
	35.574	55.9457	91.7257				49.9157	66.3657	106.449				32.7907	87.674
	38.5573	58.349	156.734				50.1223	70.1573	120.664				33.219	92.4623
	39.1173	59.1023					55.2073	73.144	133.142				38.3123	93.7357
	46.164	60.1507					58.319	74.6723	135.667				43.7723	105.401
	50.3523	86.2123					62.9007	76.0057	156.276				44.0523	107.014
	53.7823	86.4707					63.184	82.034	164.042				47.299	108.584
	54.644	95.1973					64.509	84.8307					49.934	110.869
	55.7373	98.4607					65.5173	89.259					54.0357	117.202
	56.0757	100.122					66.3873	90.954					57.919	127.947
	60.5773	114.772					68.6207	93.2107					61.2823	144.511
	62.519	136.712					70.649	102.956					64.0423	145.139
	64.769	141.792					75.139	104.642					66.414	153.221
	66.0673	142.947					77.7257	111.081					67.834	154.536
	68.1823	147.496					79.534	112.479					73.3773	161.522
	69.3307	147.742					81.144	112.741					78.7107	165.871
	76.3157	149.332					82.8373	117.362					83.3523	173.532
	78.5457	150.649					86.664	134.934					90.9123
	79.8907	150.907					89.6257	143.007					91.684
	83.9223	151.099					92.7857	143.734					98.064
	87.2473						96.6323	145.017					99.2107
	88.1623						102.677	145.367					103.452
	93.009						103.254	145.619					107.086
	97.9207						104.777	145.862					111.002
	100.147						108.811	146.049					119.507
	103.251						115.847	160.461					120.127
	107.314						118.447						124.524
	109.827						119.629						126.606
	114.092						124.727						129.832
	118.229						128.914						131.671
	121.599						133.194						135.542
	125.699						137.974						138.734
	134.322						138.491						146.609
	136.351						145.991						150.389
	140.406						148.487						157.769
	143.011						151.032						159.769
	144.336						153.392						162.346
	150.891						155.974						166.669
	151.406						165.306						167.406
	158.449						169.277						168.741
	161.806						169.457						170.997
	167.157						175.511						175.172
	170.729						177.104						178.714
	173.464
	178.526
