# Supplementary material for: Epac2 in midbrain dopamine neurons contributes to cocaine reinforcement via enhancement of dopamine release
Source: eLife. 2022 Aug 22;11:e80747. doi: 10.7554/eLife.80747 (PMC9436413; doi:10.7554/eLife.80747)
Supplement: Figure 2—source data 1. [file elife-80747-fig2-data1.xlsx]

## Sheet: Figure 2
Figure 2A	FR1						Figure 2B	FR1						Figure 2C	FR1						Figure 2D	Multiple dose						Figure 2E	Multiple dose						Figure 2F	PR			Figure 2G	PR
	Training session	Active nose pokes						Training session	Inactive nose pokes						Training session	Cocaine infusions						Cocaine (mg/kg/infusion)	WT		Epac2-cKO				Cocaine (mg/kg/infusion)	WT		Epac2-cKO				Cocaine infusion				PR breakpoint
		WT		Epac2-cKO					WT		Epac2-cKO					WT		Epac2-cKO					Mean	S.E.	Mean	S.E.				Mean	S.E.	Mean	S.E.			WT	Epac2-cKO			WT	Epac2-cKO
		Mean	S.E.	Mean	S.E.				Mean	S.E.	Mean	S.E.				Mean	S.E.	Mean	S.E.			0	6.375	0.94373	3.66667	1.05409			0	0	0	0	0			9.33333	6.66667			23	12
	1	23.1	3.73408	21.1818	6.95024			1	9.2	1.17189	12.1818	2.8977			1	17.4	3.07837	14.9091	4.23718			0.03125	9.625	1.80216	5.77778	1.18764			0.03125	0.30078	0.05632	0.18056	0.03711			8	7.66667			16	15
	2	39.8	7.52743	31.5454	7.75109			2	6.1	1.36178	7.45455	0.98501			2	29	5.01815	25.0909	6.06698			0.0625	20	1.74233	13.2222	1.9349			0.0625	1.25	0.1089	0.82639	0.12093			8.33333	5.33333			17	8
	3	49.7	8.78136	34.1818	8.8089			3	5	1.06719	4.54545	0.91814			3	35.6	4.70242	25.8182	6.13606			0.125	26.125	1.69492	16.3333	1.29099			0.125	3.26563	0.21187	2.04167	0.16137			8.33333	5			17	7
	4	53.3	7.52189	36.8182	4.55835			4	4.55556	1.0289	7.63636	3.04294			4	39.9	4.86257	29.8182	4.35226			0.25	17	1.69031	12.8889	1.72759			0.25	4.25	0.42258	3.22222	0.4319			9.66667	8			23	16
	5	59.6	7.07295	35.1818	3.75577			5	5.1	1.30341	6.81818	1.77261			5	47.2	3.85605	28.1818	3.0033			0.5	10.625	1.19429	7.33333	0.83333			0.5	5.3125	0.59715	3.66667	0.41667			9	4.66667			30	7
	6	63.5	5.84475	41	2.7136			6	4.6	0.80554	7.09091	1.72392			6	48.4	3.5909	33.1818	2.76609			1	6	0.94491	3.77778	0.61864			1	5.75	0.97742	3.77778	0.61864			11.3333	9.66667			33	23
	7	66.6	6.20967	49.0909	7.65204			7	5.9	1.32874	5.09091	1.28243			7	49.8	3.79186	38.3636	4.94566																	6.66667	6.66667			11	12
	8	70.2	7.04872	51.1818	5.30834			8	4.6	0.83267	4	1.04447			8	50.2	3.80622	39.9091	3.59407																	5.66667	6.66667			9	12
	9	68.4	7.20525	48.5	7.72478			9	4.5	1.00277	5.63636	1.68562			9	52	4.17133	37.9091	4.3074																	11	3.33333			31	4
	10	67.4	5.71198	49.9	7.42286			10	4.3	0.68394	5.36364	1.64191			10	53.1	3.36141	39.1818	4.1227																		9.33333				22

## Sheet: Figure 2-figure supplement 1 
Figure 2-figure supplement 1A								Figure 2-figure supplement 1B
		Body Weight							Travel distance
		Time (Week)	WT (g)		Epac2-cKO (g)				Time (min)	WT (m)		Epac2-cKO (m)
			Mean	SEM	Mean	SEM				Mean	SEM	Mean	SEM
		4	16.82	1.5058	17	0.84011			2.5	15.6461	1.60924	16.6867	1.74483
		5	18.37	0.96771	19.31	1.17865			7.5	15.2583	1.45455	14.4146	0.85542
		6	18.74	1.0213	20.49	0.99112			12.5	13.8724	0.72676	13.8424	1.2238
		7	19.53	1.45968	20.49	1.08878			17.5	13.67	1.08596	12.0709	1.18882
		8	19.59	0.77509	22.68	1.58351			22.5	11.1484	0.65734	11.5648	0.82701
		9	22.11	0.84215	23.11	1.67918			27.5	10.5476	0.61531	11.4921	1.18078
		10	22.41	1.2018	24.56	1.8515			32.5	11.1638	0.80505	11.1873	0.44581
		11	24.26	1.44501	25.7	1.79796			37.5	10.7137	0.5977	9.715	1.21475
		12	25.72	1.90349	24.58	0.88471			42.5	8.884	0.75938	9.48238	0.75412
		13	24.305	1.66727	25.42	2.04216			47.5	8.74613	0.5943	8.091	0.75891
		14	25.37	1.6677	26.52	1.98359			52.5	8.37975	0.87909	7.07888	0.96374
		15	26.71	1.43275	26.77	1.96622			57.5	7.38345	0.84916	7.38038	0.64629
		16	26.98	1.65622	25.89	1.8587

## Sheet: Figure 2-figure supplement 3
Figure 2-figure supplement 3B					Figure 2-figure supplement 3C
	AP frequency					Cm (pF)
		WT	Epac2-cKO				WT	Epac2-cKO
		1.75	1.56				48.01	32.05
		2.33	1.85				39.47	46.07
		2.51	1.74				52.27	35.42
		1.36	1.69				54.68	45.5
		1.54	1.48				31.82	60.72
		1.85	1.89				60.44	75.21
		1.77	2.03				55.62	34.67
		1.72	2.39				65.19	43.96
		1.93	1.99				37.52	45.69
		2.21	2.14				51.92	55.9
		2.04	1.79				45.91	28.64
		1.89					54.21	33.74
		1.98					67.84	40.51
							29	49.68
							57.28	58.64
							35.78	62.32
							42.51	28.93
							39.36	54.24
							48.66	51.62
							25.68	42.84

## Sheet: Figure 2-figure supplement 4
WT							Epac2-cKO
	Time of infusions (min)							Time of infusions (min)
	Mouse 1	Mouse 2	Mouse 3	Mouse 4	Mouse 5			Mouse 1	Mouse 2	Mouse 3	Mouse 4	Mouse 5
	1.1885	3.14733	8.40067	9.789	0.084			8.16567	8.479	3.12733	20.0957	1.77067
	3.33183	5.29233	12.8657	13.059	1.424			11.8773	9.33067	3.99233	20.5807	5.899
	3.61017	14.034	15.1123	17.2823	10.5957			13.4973	26.129	8.644	23.2807	8.17233
	5.79017	17.8757	17.5357	18.3173	11.2623			13.8873	32.2357	10.389	24.624	10.6123
	7.79183	23.7307	20.7507	19.044	22.0023			17.1023	33.3923	11.649	25.0407	18.2523
	9.4835	31.429	22.9273	19.809	22.7857			20.0423	46.9057	12.0073	29.6657	23.1757
	13.8385	34.2073	26.994	21.3223	25.3323			20.8407	64.3057	12.299	30.6223	55.3523
	11.2435	38.4857	27.1857	23.054	26.2323			21.249	65.1207	43.1657	35.1673	65.004
	14.8318	40.6873	29.3557	24.359	31.7823			24.4007	65.494	46.599	65.724	67.0073
	15.8685	49.914	31.024	26.2573	33.1973			26.0673	76.9107	47.2957	67.089	73.249
	17.8818	53.2957	33.2323	27.694	34.1723			39.894	95.4173	57.5223	81.319	75.4373
	21.6385	57.314	35.519	34.5923	37.7157			56.259	96.6273	57.7157	90.2423	76.4007
	23.5485	61.679	38.6923	37.384	43.989			56.809	97.7973	67.4523	92.9907	84.6207
	23.6718	65.6573	40.4373	40.9957	45.089			64.609	99.239	70.1623	93.4573	91.404
	23.6752	70.079	44.319	42.1407	49.0273			64.789	101.057	70.379	93.9023	121.667
	25.1452	74.164	45.209	44.004	49.354			83.8273	128.457	71.0373	126.412	124.024
	26.7885	77.1973	47.514	51.3607	55.7207			89.394	128.834	82.784	135.704	126.466
	28.3668	84.8007	48.7123	52.1157	55.9323			92.879	142.931	88.044	139.959	135.152
	34.0185	89.2673	51.2423	52.4523	67.2157			93.0557	144.154	99.909	140.344	137.529
	37.2618	96.6273	53.2557	54.0423	70.6823			99.064	149.179	109.372	153.457	156.851
	39.7485	102.454	56.419	54.7823	76.084			99.8223	153.707	111.692	154.886	160.631
	40.4102	105.502	57.8607	62.2057	76.3173			108.624	154.544	123.601	157.254	161.586
	41.5768	108.821	58.2457	70.754	77.5507			108.909	170.837	132.302	157.452	162.346
	58.1168	115.022	62.464	74.8723	82.7773			124.677		132.474	160.944	162.559
	60.6602	119.042	62.9523	84.999	87.6973			136.639		135.779	174.831
	60.7818	130.109	64.1273	91.4673	88.0673			136.922		136.034	175.067
	63.4352	136.511	68.319	95.1957	91.8023			137.149		136.272
	65.1468	138.677	74.604	95.799	96.9657			137.497		146.961
	67.4435	140.636	74.8223	98.6073	112.657			137.887		148.832
	68.6035	144.789	75.064	99.0923	114.652			144.137		149.089
	71.6102	148.701	76.1123	100.486	122.836			156.182		152.216
	74.7802	153.511	80.8307	104.421	126.707			156.401		154.617
	77.7852	153.739	81.364	106.484	129.047			156.637		161.457
	79.6618	163.311	1711.55	114.076	131.849			158.189		161.861
	80.8985	167.754	173.932	127.016	138.824			172.334
	81.3718	171.254	82.1073	129.276	139.077
	85.3802	177.424	147.327	130.947	141.671
	100.562		84.6023	136.624	151.027
	103.368		164.771	137.414	153.286
	106.37		87.569	149.822	156.861
	110.327		87.7873	158.999	159.191
	112.469		89.3107	160.092	162.844
	115.34		95.694	160.429	163.201
	117.017		96.6657	162.246	171.007
	118.052		98.9473		175.404
	120.334		99.1257		175.582
	121.307		100.307		175.877
	123.403		108.642
	125.635		109.882
	127.042		113.004
	129.27		153.792
	133.125		114.042
	140.247		117.892
	144.087		119.439
	147.697		127.182
	150.418		130.352
	155.42		131.554
	157.865		132.254
	158.765		138.529
	159.224		142.827
	162.119		150.167
	167.195		155.581
	173.381		167.084
	176.844		178.404
