# Supplementary material for: Epac2 in midbrain dopamine neurons contributes to cocaine reinforcement via enhancement of dopamine release
Source: eLife. 2022 Aug 22;11:e80747. doi: 10.7554/eLife.80747 (PMC9436413; doi:10.7554/eLife.80747)
Supplement: Figure 3—source data 1. [file elife-80747-fig3-data1.xlsx]

## Sheet: Figure 3
Figure 3A	FR1						Figure 3B	FR1						Figure 3C	FR1						Figure 3D	PR			Figure 3E	PR
	Training session	Active nose pokes						Training session	Inactive nose pokes						Training session	Sucrose intake						Sucrose intake				PR breakpoint
		WT		Epac2-cKO					WT		Epac2-cKO					WT		Epac2-cKO				WT	Epac2-cKO			WT	Epac2-cKO
		Mean	S.E.	Mean	S.E.				Mean	S.E.	Mean	S.E.				Mean	S.E.	Mean	S.E.			8	5			16	7
	1	26.5	6.70554	27.625	4.59789			1	13.75	3.21131	11.625	1.61397			1	22.875	6.05757	23.875	4.07272			10	14			25	57
	2	50.5	5.50649	37.5	3.26781			2	20	5.89794	9.25	1.16113			2	40.875	5.00513	30.75	2.7435			13	11			47	31
	3	57.25	8.3746	56.875	6.52588			3	9.625	1.32203	7.625	1.19429			3	46.625	5.943	47	4.99285			8	11			16	31
	4	70.875	7.58391	68	5.03913			4	12.75	2.0244	10.25	1.29215			4	54.875	3.66176	52.75	4.24159			9	14			20	57
	5	63.25	6.20124	67.25	5.75931			5	10	1.78285	10.125	2.37124			5	51.25	4.93077	53.625	4.58233			10	14			25	57
	6	68.625	5.00691	67.625	5.27778			6	11.625	1.88923	9.75	1.76017			6	55.75	3.47311	57	3.97762			15	17			69	101
	7	66.25	4.93077	67.375	6.76899			7	5.375	1.11704	7.25	1.23563			7	55.625	3.84957	56.125	4.85665			17	9			101	20
	8	69	4.94253	73.25	8.08161			8	7.75	1.6448	5.875	0.95314			8	55.75	3.8301	54.5	4.47214
	9	80.5	3.5807	74.625	4.43983			9	6.375	0.84383	3.625	0.70553			9	64	0	59.75	3.26097
	10	78.25	6.91466	78.5	3.45345			10	6.375	1.34878	3.25	0.7258			10	60.375	3.625	64	0

## Sheet: Figure 3-figure supplement 1
Figure 3-figure supplement 1A									Figure 3-figure supplement 1B					Figure 3-figure supplement 1C					Figure 3-figure supplement 1D					Figure 3-figure supplement 1E					Figure 3-figure supplement 1F
	FR1									FR1					FR1					FR1
	Training session	Active nose pokes		Inactive nose pokes		Sucrose intake				Active nose pokes					Inactive nose pokes					Sucrose intake					PR Sucrose intake					PR breakpoint
		Mean	S.E.	Mean	S.E.	Mean	S.E.			ESI-05 (mg/kg)					ESI-05 (mg/kg)					ESI-05 (mg/kg)					ESI-05 (mg/kg)					ESI-05 (mg/kg)
	1	40.125	3.13071	14.5	1.476	30.75	2.84574			0	3.3	10			0	3.3	10			0	3.3	10			0	3.3	10			0	3.3	10
	2	50.625	6.61421	15.375	2.59076	42.75	4.90535			78	58	73			1	2	13			64	54	64			13	11	8			47	31	16
	3	67.875	5.23872	7.875	2.27908	55.375	3.6642			32	60	63			2	2	13			27	46	57			9	9	15			20	20	69
	4	68.625	3.17882	11.375	2.99367	55.25	1.69821			75	19	62			2	8	5			56	20	46			13	14	10			47	57	25
	5	74.875	3.29739	7.625	1.08459	57.625	2.04361			69	75	77			5	21	8			59	56	64			10	13	7			25	46	13
	6	75.375	4.07491	7.625	1.75191	57.875	1.56339			81	75	49			14	12	2			61	64	37			14	14	14			57	57	57
	7	76.25	4.70467	8.25	1.71912	52.125	2.76094			97	64	61			12	10	2			64	56	49			15	11	13			69	31	47
	8	77.125	2.76094	5	0.84515	60.625	1.20915			74	75	48			2	5	0			59	62	46			14	15	12			57	69	38
	9	79.5	1.91796	4	0.88641	59.25	1.42365			82	43	73			6	7	4			64	40	52			11	10	10			31	25	25
	10	77.875	0.875	2.625	0.77776	60.625	0.75445

## Sheet: Figure 3-figure supplement 2
	WT							Epac2-cKO
		Time of sucrose intake (min)							Time of sucrose intake (min)
		Mouse 1	Mouse 2	Mouse 3	Mouse 4	Mouse 5			Mouse 1	Mouse 2	Mouse 3	Mouse 4	Mouse 5
		0.2688	1.5276	2.3988	0.1476	1.7424			1.3242	1.1856	0.1176	0.3006	1.5174
		0.9738	1.9326	5.0022	2.7408	2.4654			2.5908	1.4292	0.7338	0.6576	1.8372
		1.2354	4.9254	6.7626	5.4804	2.8392			2.7042	2.4138	2.5338	1.0806	2.5476
		1.7154	5.7588	7.5726	6.2838	3.6654			2.8872	2.649	3.6006	1.6572	3.0288
		1.8042	6.6474	11.2272	7.854	3.7704			5.4108	3.129	5.0322	2.7426	3.9654
		1.9476	6.9906	11.6838	11.5608	3.8658			5.5626	3.2442	6.6972	3.2088	4.2276
		2.0454	8.2824	12.7422	12.8154	4.8324			5.6538	3.4224	7.9476	3.5406	4.9188
		2.8056	8.8074	13.0722	14.9106	4.9938			5.9208	3.5238	9.5676	7.4238	5.3538
		3.0942	9.2892	14.5572	16.0338	5.1024			6.4026	5.0892	9.7092	8.8824	6.1374
		5.1258	9.684	14.9004	17.7174	6.8676			6.5172	7.6422	12.489	9.6138	6.2922
		5.8692	11.0688	15.954	18.6954	7.1208			6.6456	7.9872	12.5874	10.9956	7.9524
		6.6708	11.9406	16.3254	21.1074	9.3306			6.9858	8.0958	14.2692	11.2122	8.4858
		7.0122	12.7692	17.4108	21.3624	9.4626			7.1172	9.1626	14.3592	11.9022	10.0854
		7.3656	12.8724	17.7738	22.5204	11.4642			7.6008	9.2838	16.464	13.749	11.1672
		7.4676	13.5624	18.3354	23.6208	13.9974			7.8222	9.3876	17.5908	15.1776	11.6226
		8.2872	14.5692	19.0404	25.3158	14.199			8.9574	9.5724	19.8606	15.3042	12.8772
		8.5104	14.8656	20.3904	26.0922	14.319			9.1674	10.0308	20.004	16.584	13.2438
		8.9574	15.2376	20.619	27.2574	16.5708			9.4908	10.1304	21.2724	18.1038	13.7526
		9.0426	16.5492	21.3474	28.3788	16.8174			11.1654	11.0088	21.4638	18.4572	14.484
		9.2238	17.8092	23.349	28.8756	17.2458			13.3026	12.5526	22.4004	18.6024	14.7456
		9.3354	19.8288	23.8674	29.0658	17.499			13.8888	15.2472	23.5872	19.8192	15.9072
		9.5172	20.3892	25.359	30.4704	19.4574			14.0154	15.954	24.6708	21.8538	16.5054
		9.9324	20.4888	26.1708	32.8326	20.1672			14.1006	16.3392	27.5856	21.9642	16.8222
		10.5792	22.8504	26.5788	34.0872	21.1224			14.469	18.4908	27.684	22.8642	18.5706
		10.7508	23.2104	26.859	34.944	21.3438			15.3888	18.6522	29.0526	23.3658	19.1874
		12.6858	24.7026	27.444	36.5772	23.3424			15.5574	20.2404	29.1372	23.664	23.9406
		12.834	24.8742	29.0124	36.6942	25.4508			15.669	20.3304	29.9376	25.0026	24.0756
		12.9456	25.119	30.8574	37.794	25.6692			15.8706	20.5254	31.1172	25.1172	26.3076
		13.0422	25.2942	31.3692	37.8954	25.9956			17.0358	20.6358	31.9608	25.6926	27.3342
		14.3004	26.5974	32.1876	38.6148	27.9756			17.2104	20.949	32.2176	26.0988	28.0854
		16.1658	26.7474	32.2806	39.5244	28.2372			18.6576	21.0924	33.1758	26.4126	30.5154
		16.2492	27.8592	34.0074	39.5724	31.8372			21.1926	21.204	33.4254	26.5476	31.3356
		16.4088	28.2042	34.1208	39.879	34.0458			21.3138	22.9056	34.4508	26.6808	31.8408
		16.6374	29.2404	36.654	41.1582	35.1738			23.5026	23.3526	36.9126	26.9838	32.5176
		17.9976	29.3454	36.9456	41.9262	37.2792			27.2076	26.0574	37.8804	27.1422	33.0672
		18.2892	29.5224	38.4024	42.1758	40.3104			27.4524	28.6938	39.141	29.049	33.4758
		18.4074	30.4458	38.634	42.2922	41.0658			27.5724	29.484	39.5922	29.1588	33.6174
		21.6822	30.5874	40.5108	44.6754	42.0774			27.7056	30.2538	40.5924	29.5158	36.4824
		21.9006	33.0642	41.5476	45.2772	42.4392			29.3658	34.2042	41.0472	30.3042	36.7392
		22.419	33.4554	43.1022	45.4224	42.8856			30.2574	34.809	41.7444	32.8176	36.9972
		23.3976	34.2354	45.5256	46.704	44.4792			31.0026	38.4438	42.3276	32.9142	38.7222
		23.5254	38.469	46.1472	47.9904	45.4392			31.3974	38.5422	43.017	33.1308	40.1592
		24.939	40.4106	46.4454	48.1008	45.5472			35.6088	38.949	43.6506	35.229	40.284
		26.7804	40.5324	46.869	49.3104	47.7408			36.4056	39.0576	43.8408	35.8422	40.5108
		27.4842	41.4738	47.3472	50.9106	47.9538			36.8292	40.8306	43.989	36.054	42.8172
		31.5408	41.7756	49.9008	51.4182	50.2338			37.179	43.3308	45.0522	36.6492	43.5384
		33.6354	42.9408	52.2624	51.6768	50.3658			37.8504	43.9674	45.2508	36.7488	44.1384
		38.8092	43.149	52.7022	53.247	50.6724			39.1074	45.8172	46.0704	37.2426	46.5384
		39.8808	43.6524	52.8072	53.5302	52.4172			44.7072	47.784	48.1122	37.8006	47.1384
		41.3508	45.5622	56.4924	55.2792	52.9308			44.8656	48.2292	48.2154	38.3142	47.7906
		45.5556	47.1288		55.7076	55.2576			49.5276	48.9006	50.0976	38.5692	48.5058
		45.6906	47.2242		55.8072	55.4772			49.659	49.3056	50.1858	40.0338	48.7926
		46.3788	47.3958		57.2544	55.8408			50.0742	50.0724	51.0906	40.1358	48.894
		46.5792	47.4876		57.9522	55.9704			50.6856	50.5404	51.9006	40.2708	49.2906
		48.2748	47.7642		58.1922	57.3822			50.9826	52.2108	53.2554	45.8172	50.7372
		50.859	48.0474		59.1456	58.1268			51.2388	54.5154	57.1692	46.2354	51.189
		51.6858	48.1788		59.4942	59.1366			51.4476	59.844	57.5826	49.6176	51.7458
		52.5576	49.4424		59.8122	59.9382			53.274			50.217	53.019
		53.6868	49.8558						53.7924			51.9126	54.2136
		54.0762	50.8524						54.9138			53.7282	55.7292
		56.3382	51.1374						55.479			55.4184	56.5938
		57.9438	52.539						56.1846			57.3876	56.8908
		58.707	53.724						59.1276			59.5158	58.5384
		59.7246	54.4842									59.6058	59.0736
