# Supplementary material for: Epac2 in midbrain dopamine neurons contributes to cocaine reinforcement via enhancement of dopamine release
Source: eLife. 2022 Aug 22;11:e80747. doi: 10.7554/eLife.80747 (PMC9436413; doi:10.7554/eLife.80747)
Supplement: Figure 4—source data 1. [file elife-80747-fig4-data1.xlsx]

## Sheet: Figure 4
	Figure 4B										Figure 4C										Figure 4E										Figure 4F
		Dopamine concentration (μM)										τ (s)										Dopamine concentration (μM)										τ (s)
		NAc Core		NAc Shell		DMS		DLS				NAc Core		NAc Shell		DMS		DLS				NAc Core		NAc Shell		DMS		DLS				NAc Core		NAc Shell		DMS		DLS
		WT	Epac2-cKO	WT	Epac2-cKO	WT	Epac2-cKO	WT	Epac2-cKO			WT	Epac2-cKO	WT	Epac2-cKO	WT	Epac2-cKO	WT	Epac2-cKO			WT	Epac2-cKO	WT	Epac2-cKO	WT	Epac2-cKO	WT	Epac2-cKO			WT	Epac2-cKO	WT	Epac2-cKO	WT	Epac2-cKO	WT	Epac2-cKO
		0.18025	0.17925	0.6975	0.3964	1.1956	0.80025	1.4421	0.9057			0.82	0.39	0.93	0.79	1.11	1.05	0.576	1.01			0.8028	0.71325	0.9495	0.4497	1.3617	1.2958	1.2306	0.9978			0.36	1.04	0.45	0.44	0.55	0.91	0.51	0.5
		0.20975	0.2811	0.57575	0.2517	1.04195	0.8625	1.1505	0.9708			0.7	0.75	0.53	1.06	0.42	0.69	0.517	0.59			0.4848	0.75555	0.87915	0.4924	1.4223	1.0802	1.6527	0.98145			0.45	0.74	0.5	0.73	0.46	0.57	0.44	0.63
		0.66025	0.3126	1.0132	0.4815	0.92855	0.81255	1.38	0.8949			0.63	0.94	0.9	0.76	0.93	0.66	0.73	0.6			0.3872	0.785	0.98295	0.3132	1.1976	1.2286	1.7781	0.9564			0.6	0.69	0.83	1.33	0.59	0.37	0.37	0.42
		0.4425	0.2805	0.9828	0.5157	1.2628	0.68535	1.8033	0.6435			0.74	0.54	0.58	0.47	0.72	0.77	0.58	0.53			0.4056	0.5137	0.88005	0.4516	1.9796	0.88625	1.3215	1.0178			0.92	0.97	0.64	0.53	0.55	0.82	0.45	0.96
		0.669	0.453	0.757	0.29745	1.46405	0.87135	1.7751	0.825			0.5	0.48	0.7	1.07	0.46	0.93	0.66	0.77			0.42075	0.684	0.8433	0.595	1.84625	0.92535	1.2429	1.0974			0.69	0.91	0.59	0.47	1.21	0.45	1.21	0.55
		1.038	0.64475	0.9222	0.49005	1.8319	0.85605	1.6929	0.8646			0.4	0.95	0.89	0.68	1.09	0.53	0.59	0.42			0.407	0.40635	0.7617	0.45045	2.072	0.9009	1.1871	1.02855			0.621	0.84	0.78	0.6	1.14	0.76	1.07	0.86
		0.6145	0.58625	0.2574	0.21285	1.6807	0.9438	1.5408	0.7959			0.93	0.87	0.76	0.97	0.39	0.43	0.72	0.47			0.42525	0.20085	0.4004	0.64085	1.6961	0.94935	1.2813	0.74265			1.07	0.529	0.66	0.72	0.89	0.87	1.12	0.93
		0.7825	0.46755	0.44	0.429	1.40805	0.9375	1.4046	0.6687			0.5	0.58	1.04	0.45	0.3	0.52	1.01	1.12			0.90185	0.21585	0.4785	0.1782	1.5338	0.7865	1.2066	0.732			0.95	0.86	0.6	1.13	0.77	1.21	0.89	1.07
		0.454	0.23685	0.53775	0.1875	1.3195	0.9573	1.317	0.6798			0.86	0.39	0.74	0.59	0.69	0.8	0.53	0.57			0.70125	0.5766	0.483	0.2082	1.5502	0.82525	1.4202	0.8915			0.91	0.57	0.95	1.05	0.59	1.06	0.73	1.16
		0.3684	0.27075	0.6666	0.18135	1.3447	1.0969	1.2087	0.7495			0.64	1.1	1	0.86	0.74	0.83	0.68	0.6			0.70155	0.30075	0.573	0.3336	1.4446	0.76975	2.2015	0.866			0.85	0.49	0.87	0.95	0.85	1.15	0.58	0.58
		0.3414	0.2592	0.6858	0.20895	1.11125	1.06435	1.2099	0.76575			0.49	0.42	0.51	0.8	0.72	0.47	1.03	0.79			0.6372	0.327	0.4548	0.33735	1.2342	0.80025	2.049	0.5133			0.67	0.73	1.14	0.77	0.72	0.83	0.69	0.97
		0.3204	0.2155	0.5362	0.3108	1.0143	0.60095	1.0932	0.76175			0.71	1.02	0.79	0.7	0.67	1.05	1.26	0.54			0.4506	0.12895	0.6895	0.4677	2.1753	0.81725	1.5819	0.4848			0.77	0.92	0.76	0.64	0.71	0.71	0.81	0.83
		0.3684	0.2799	0.40725	0.2841	1.15255	0.62545	1.1085	0.769			0.96	0.68	0.69	0.58	0.53	0.97	0.93	0.85			0.53955	0.3438	0.3182	0.334	2.0949	0.52675	1.5732	1.1305			0.72	0.58	0.91	0.58	1.1	0.62	0.93	0.76
		0.61005	0.36445	0.48825	0.2934	0.7539	0.66395	1.1511	0.37825			0.62	0.6	0.92	0.71	0.76	0.52	1.09	0.71			0.9926	0.20355	0.4263	0.3542	1.9476	0.5908	1.0969	0.5537			0.62	0.42	0.83	0.72	1.01	0.49	1.01	0.53
		0.46215	0.12988	0.50775	0.27435	1.1606	0.738	0.82005	0.4495			0.59	0.56	0.63	0.47	0.81	0.89	0.93	0.92			1.23425	0.404	0.3095	0.23265	1.0248	0.5999	1.02195				0.73	0.66	0.62	0.83	0.87	0.59	0.75
		0.2835	0.4284	0.29655	0.2952	1.09375	0.522	0.6564	0.47495			0.46	0.71	0.74	1.06	0.89	0.42	1.07	0.96				0.3655			0.8695		0.94625					0.71			0.68		0.68
		0.28995	0.2964	0.49825	0.18	1.30165	0.6024	0.91695	0.6669			1.36	0.58	0.65	0.98	0.41	1.13	0.79	0.88							1.2676		1.9629								0.57		0.97
		0.2979	0.21	0.26355	0.21	1.14765	0.37475	0.92055	0.74835			0.91	0.61	0.82	0.96	0.54	0.58	0.63	0.75							1.6392										0.81
		0.29595		0.3846	0.4975	1.5106	0.3695	0.9012	0.76845			1.09		1.21	0.83	1.05	0.505	0.82	0.65
		0.6027				1.41495	0.37525	0.80575	0.807			1				0.65	0.72	0.63	1.36
						1.30935	0.379		0.77865							0.61	0.83		0.85
						1.7836										1.01
