# Supplementary material for: Epac2 in midbrain dopamine neurons contributes to cocaine reinforcement via enhancement of dopamine release
Source: eLife. 2022 Aug 22;11:e80747. doi: 10.7554/eLife.80747 (PMC9436413; doi:10.7554/eLife.80747)
Supplement: Figure 5—source data 1. [file elife-80747-fig5-data1.xlsx]

## Sheet: Figugre 5
	Figure 5A							Figure 5B						Figure 5C								Figure 5D							Figure 5E							Figure 5F
		Time (min)	S-220 (0.3 μM)		S-220 (10 μM)				S-220 (μM)						Time (min)	WT		Epac2-cKO					Time (min)	Vehicle		ESI-05				Time (min)	S-220 + Vehicle		S-220 + H89				Time (min)	6-Bnz + Vehicle		6-Bnz + H89		Epac2-cKO + 6-Bnz
			Mean (%)	SEM	Mean (%)	SEM			0.3	1	3	10				Mean (%)	SEM	Mean (%)	SEM					Mean (%)	SEM	Mean (%)	SEM				Mean	SEM	Mean	SEM				Mean (%)	SEM	Mean (%)	SEM	Mean (%)	SEM
		-14	103.117	4.0353	101.937	3.54201			103.243	103.664	123.846	142			-14	101.937	3.54201	95.4724	5.52989				-14	101.937	3.54201	98.9894	6.44156			-14	101.937	3.54201	99.7817	2.66396			-14	97.363	4.14499	99.8737	4.47665	103.743	4.53204
		-12	98.3276	3.56895	100.095	4.0866			85.6	106.404	133.333	140			-12	100.095	4.0866	102.772	3.96337				-12	100.095	4.0866	99.6987	2.33766			-12	100.095	4.0866	99.335	13.2661			-12	98.2454	6.70188	111.926	5.20747	94.0425	3.36369
		-10	101.963	3.95132	94.8602	4.02648			104.147	118.085	159.286	135.689			-10	94.8602	4.02648	97.6454	2.72323				-10	94.8602	4.02648	100.231	3.41496			-10	94.8602	4.02648	99.3829	0.78194			-10	91.7345	4.48526	106.345	6.08882	104.337	6.0605
		-8	107.366	5.45379	94.4176	3.27262			97.5	135.714	126.874	187.937			-8	94.4176	3.27262	99.4218	1.34761				-8	94.4176	3.27262	99.9364	4.83805			-8	94.4176	3.27262	98.737	2.0493			-8	95.8228	3.19671	97.9498	5.30779	95.2203	3.35926
		-6	98.9503	2.34614	102.06	3.01269			103.746	112.707	124.8	145.97			-6	102.06	3.01269	99.0829	4.37224				-6	102.06	3.01269	98.4836	2.65765			-6	102.06	3.01269	99.9938	5.74684			-6	97.3917	2.38409	102.725	4.95053	97.4916	3.18473
		-4	99.3647	2.94843	95.6684	3.37063			91.8001	122.222	136	148.352			-4	95.6684	3.37063	96.7392	3.29541				-4	95.6684	3.37063	97.9355	6.51853			-4	95.6684	3.37063	98.8083	12.5504			-4	99.8734	4.1532	100.464	3.7559	98.4833	5.64571
		-2	99.2911	1.2521	98.406	3.20101					131.925	137.113			-2	98.406	3.20101	101.09	2.16068				-2	98.406	3.20101	98.4724	3.85889			-2	98.406	3.20101	98.5341	3.62115			-2	99.8676	2.12919	98.7937	3.60225	100.726	1.72911
		0	96.6153	4.97736	100.356	4.10121						154			0	100.356	4.10121	92.1265	4.44712				0	100.356	4.10121	102.452	4.62746			0	100.356	4.10121	106.69	4.12631			0	98.1411	3.42589	93.6826	6.46223	104.246	2.93219
		2	92.7608	6.50213	101.548	6.30306						139.592			2	101.548	6.30306	102.343	5.80107				2	101.548	6.30306	101.717	4.71288			2	101.548	6.30306	91.5735	13.8543			2	105.394	5.38181	90.2015	16.0688	99.1713	5.9393
		4	110.637	9.98858	110.25	8.07727									4	110.25	8.07727	100.569	4.38669				4	110.25	8.07727	99.3528	3.92416			4	110.25	8.07727	107.233	10.4122			4	111.145	5.56241	106.012	5.00625	104.193	5.61589
		6	96.1684	4.20356	107.469	6.35419									6	107.469	6.35419	105.896	7.90494				6	107.469	6.35419	98.3126	6.59946			6	107.469	6.35419	115.967	10.7985			6	115.042	5.20441	94.5993	6.44183	116.753	9.80655
		8	92.0207	4.23605	101.576	5.53352									8	101.576	5.53352	100.228	3.45951				8	101.576	5.53352	99.9914	4.32336			8	101.576	5.53352	123.801	8.93601			8	119.219	5.56746	105.294	17.0922	115.803	8.60734
		10	93.7184	2.55432	107.36	8.46965									10	107.36	8.46965	94.8359	4.58983				10	107.36	8.46965	106.545	5.62232			10	107.36	8.46965	122.285	7.24675			10	124.827	6.83753	95.0512	3.94365	115.853	5.85879
		12	94.282	3.31226	114.277	6.97566									12	114.277	6.97566	97.5595	3.85242				12	114.277	6.97566	100.816	4.29287			12	114.277	6.97566	129.062	6.5568			12	129.499	5.59321	94.423	8.97768	120.037	8.52566
		14	96.6212	6.18145	115.731	7.90039									14	115.731	7.90039	97.3949	4.06719				14	115.731	7.90039	93.9403	5.8306			14	115.731	7.90039	124.324	6.52203			14	132.695	6.91179	99.4125	6.6182	118.248	7.65332
		16	91.9304	4.76808	124.644	5.45454									16	124.644	5.45454	100.619	4.49603				16	124.644	5.45454	88.1755	7.28824			16	124.644	5.45454	138.859	9.48555			16	132.713	7.25897	100.686	4.64462	124.468	6.95073
		18	92.5646	6.12562	126.978	7.03516									18	126.978	7.03516	102.255	4.28726				18	126.978	7.03516	106.432	5.71797			18	126.978	7.03516	135.729	9.05977			18	142.216	6.68179	95.7398	9.07591	127.579	8.04541
		20	96.1109	3.99657	127.32	7.35748									20	127.32	7.35748	105.652	4.94532				20	127.32	7.35748	95.8948	6.74762			20	127.32	7.35748	136.476	8.46155			20	143.642	7.35541	97.0197	3.40792	134.475	8.75883
		22	101.68	2.89163	130.019	8.02867									22	130.019	8.02867	104.088	4.6552				22	130.019	8.02867	99.8717	5.12217			22	130.019	8.02867	131.323	7.18456			22	149.381	6.151	91.7865	3.94136	134.31	10.411
		24	93.0153	6.98696	139.914	7.35082									24	139.914	7.35082	103.94	6.56377				24	139.914	7.35082	105.074	5.69164			24	139.914	7.35082	137.508	7.3638			24	146.979	9.83897	101.714	9.46113	133.282	7.85954
		26	94.9209	5.39448	134.669	6.468									26	134.669	6.468	100.088	3.34136				26	134.669	6.468	103.325	6.38289			26	134.669	6.468	132.955	9.28993			26	149.321	9.97206	92.8717	6.22735	138.254	5.16784
		28	104.696	6.33166	141.954	3.86911									28	141.954	3.86911	106.117	2.96905				28	141.954	3.86911	101.973	2.27223			28	141.954	3.86911	136.653	3.63146			28	145.108	9.3029	106.185	4.74835	145.567	6.90962
		30	101.437	5.32241	145.972	5.65267									30	145.972	5.65267	101.914	3.66564				30	145.972	5.65267	99.8867	3.75683			30	145.972	5.65267	143.972	8.06044			30	151.446	6.32372	103.303	4.10019	145.445	8.19502
		32	98.0129	4.5857	148.143	8.07939									32	148.143	8.07939	103.244	4.3129				32	148.143	8.07939	101.986	2.62191			32	148.143	8.07939	139.042	4.02508			32	152.026	10.5506	97.338	5.53629	152.419	7.56647
		34	94.069	5.69226	145.499	5.8406									34	145.499	5.8406	101.523	4.53091				34	145.499	5.8406	106.284	3.4048			34	145.499	5.8406	139.54	4.31883			34	163.337	9.3203	105.865	6.19695	151.867	7.08415
		36	94.1478	5.86301	149.582	7.47228									36	149.582	7.47228	104.784	3.55845				36	149.582	7.47228	104.995	3.86945			36	149.582	7.47228	159.537	18.1662			36	164.217	10.5828	96.4313	3.36586	148.872	6.9338
		38	94.6233	4.14627	147.352	8.20174									38	147.352	8.20174	101.207	6.48751				38	147.352	8.20174	105.013	2.65086			38	147.352	8.20174	145.12	4.34825			38	163.559	8.63226	100.96	6.32593	149.914	5.92919
		40	95.0932	14.0931	152.005	5.17812									40	152.005	5.17812	102.685	3.30884				40	152.005	5.17812	98.5624	3.5647			40	152.005	5.17812	153.892	10.7901			40	154.313	8.03709	95.441	6.55209	153.928	12.6858
