# Supplementary material for: Epac2 in midbrain dopamine neurons contributes to cocaine reinforcement via enhancement of dopamine release
Source: eLife. 2022 Aug 22;11:e80747. doi: 10.7554/eLife.80747 (PMC9436413; doi:10.7554/eLife.80747)
Supplement: Figure 6—source data 1. [file elife-80747-fig6-data1.xlsx]

## Sheet: Figure 6
Figure 6B									Figure 6C									Figure 6E											Figure 6F							Figure 6G
	Time (min)	Events/minute			Events/minute					Time (min)	Events/minute			Events/minute					Session	Active nose pokes				Inactive nose pokes						Session	Cocaine infusions						Cocaine (mg/kg/infusion)	mCherry				rM3D(Gs)
		Mean	SEM		Baseline	Vehicle	DCZ +				Mean	SEM		Baseline	H89	DCZ +				mCherry		rM3D(Gs)		mCherry		rM3D(Gs)					mCherry		rM3D(Gs)					Vehicle		DCZ		Vehicle		DCZ
	1	8.7	0.9551		5.3	8.05	17.7667			1	9.4	1.58605		6.15	9.05	11.9333				Mean	SEM	Mean	SEM	Mean	SEM	Mean	SEM				Mean	SEM	Mean	SEM				Mean	SEM	Mean	SEM	Mean	SEM	Mean	SEM
	2	8	0.8165		5.4	7.05	15.1			2	9.6	1.11754		13	10.05	11.0167			1	13.7143	2.82602	8.11111	2.42352	8.28571	0.94401	9.22222	2.44823			1	11.2857	2.4661	7.55556	2.11549			0	2.66667	0.84984	4.22222	1.24474	2	0.65465	6.625	0.92461
	3	8.9	0.95975		12.2	10.95	17.0167			3	10	1.48324		11.8	11.1	8.08333			2	21.2857	1.50735	16.3333	5.66912	5.14286	1.54963	7.33333	1.74801			2	16.4286	1.91308	12.4444	4.79905			0.03125	5.44444	1.65924	4.44444	1.11941	3.625	1.29474	15.125	1.86545
	4	10	1.16428		12.7	14.95	19.9667			4	8.6	1.19443		11.1	13	8.93333			3	24.2857	1.50735	15.1111	3.90315	5.28571	1.32223	6.66667	1.37437			3	18.4286	1.34265	12.3333	2.65623			0.0625	13.7778	0.87841	12.8889	1.66203	11.25	1.12995	21.125	2.74146
	5	8.3	1.26535		10	12.05	14.9667			5	9.1	1.60866		8.95	10.45	8.03333			4	27	1.67616	25.3333	3.11359	4.85714	1.59506	4	1.66667			4	22	2.13809	21.8889	2.86959			0.125	15.1111	0.65499	16.8889	1.76733	14.25	1.22109	18.25	1.82981
	6	7.7	1.41461		8.5	11.8	21.0667			6	9.7	0.86987		7.8	8.55	7.06667			5	27	1.36277	28.6667	3.937	5.14286	2.08656	5	1.96497			5	23.1429	1.05624	24.7778	3.27354			0.25	9.66667	0.98601	11.4444	0.78371	12.625	0.625	13.5	2.21198
	7	8.7	1.38283		9.3	9	21.9833			7	7.9	1.53804		10.15	11.25	4.13333			6	35.4286	2.93466	29.1111	5.6432	3.85714	1.33503	4.44444	1.81897			6	30.8571	3.38363	26.4444	4.81926			0.5	6.33333	0.84984	8.33333	0.86603	7	0.73193	8.25	1.14564
	8	6.9	1.02686		7.7	5.05	12.15			8	8.4	1.64114		7.05	5.05	8.01667			7	40	2.9032	38.2222	6.64951	5.85714	1.81827	4.11111	2.86475			7	34.8571	2.86546	32.6667	4.53076			1	4	1.11803	4.11111	0.20031	4.875	0.35038	3.375	0.7304
	9	8.1	0.78102		6.1	6.05	11.0333			9	8.2	1.71788		4.9	6.1	7.05			8	40.5714	2.71554	36.3333	5.67157	4.85714	1.77856	4	1.55456			8	37.1429	2.85714	31.1111	4.78552
	10	8.4	1.249		5	3.95	9.08333			10	8.3	1.09595		7.95	7.1	12.9167			9	39.5714	2.22387	40.7778	2.53737	4	1.17514	3.22222	1.03786			9	34.7143	2.27527	35.2222	1.85426
	11	8.4	1.30128							11	10.3	1.13578							10	43.2857	2.64318	40.8889	3.89603	3.85714	1.62464	5.44444	1.9011			10	37.4286	2.43836	35.2222	4.31012
	12	8.6	0.84591							12	7.2	1.17189							11	41.2857	1.32223	54	4.03113	2.85714	0.79966	5	1.38444			11	34.8571	1.63923	48.3333	3.10018
	13	8.1	1.59478							13	8.5	1.71432							12	44.5714	2.96694	54.4444	2.58796	4.14286	1.40456	3.77778	0.98288			12	39	2.51661	49	1.81812
	14	6.8	1.1907							14	8.8	1.56205							13	43.1429	2.75533	60.5556	3.53597	2.28571	0.68014	3.55556	1.56446			13	38	1.43095	52.8889	3.0113
	15	8	1.74483							15	9.3	1.21152							14	41.7143	1.96049	40.7778	2.74761	2	0.69007	2.55556	0.94444			14	38.7143	1.2289	36	3.05959
	16	7.8	1.25433							16	8.9	1.51621							15	39.4286	2.69795	39.8889	1.53156	2	0.7868	1.66667	0.40825			15	36.2857	1.8608	34.5556	1.6759
	17	8.4	1.55778							17	8.5	1.31867							16	41.8571	2.0051	39.8889	2.62702	2.57143	0.84112	2.55556	0.68943			16	38.8571	1.84428	35.7778	2.26555
	18	7.7	1.16476							18	9.3	1.20231
	19	8.4	1.25786							19	9.6	1.57198
	20	8.5	1.07755							20	8.1	1.16857
	21	8.2	1.10353							21	10.4	1.249
	22	9	1.10554							22	9.9	1.25122
	23	6.8	1.21838							23	8.9	1.21518
	24	9.4	1.4922							24	9.2	1.16237
	25	9.7	1.57797							25	8.1	1.34536
	26	11	1.91485							26	10.1	1.23333
	27	9	1.40633							27	7.8	1.1431
	28	8.9	1.68951							28	10	1.61245
	29	9.4	1.27541							29	10	1.2561
	30	9.4	1.46969							30	9.3	1.53514
	31	8.3	1.54236							31	9	1.64655
	32	9	1.11555							32	9.4	1.56489
	33	8.2	1.33998							33	9.3	0.7157
	34	9.3	1.62652							34	10.6	1.55063
	35	10.3	1.99472							35	7.9	1.49406
	36	9	1.63978							36	9.7	1.68028
	37	8.2	0.69602							37	7.3	1.29142
	38	8.1	1.02686							38	9.8	1.41264
	39	8.2	1.45144							39	7.8	1.41264
	40	8.4	1.65462							40	8.9	1.17804
	41	8.9	1.41774							41	9.6	1.55063
	42	9.8	0.74237							42	8.9	1.36991
	43	10.3	1.02252							43	8.5	0.96896
	44	12.8	1.50407							44	8.2	0.85375
	45	16.9	1.55956							45	8.8	0.86667
	46	17.4	1.28409							46	9.5	1.70783
	47	19.5	1.68819							47	10.6	1.68787
	48	19.8	2.07525							48	8.6	0.56174
	49	20.6	1.49963							49	9.2	1.58325
	50	19.2	1.74992							50	7.6	1.29271
	51	20.3	1.78916							51	7.8	1.43604
	52	20.3	2.12942							52	9.1	0.80898
	53	21.3	1.79536							53	10.2	1.76257
	54	21.6	2.04505							54	9.1	1.11006
	55	19.9	1.77294							55	9.7	1.43798
	56	19.5	1.10805							56	9.7	1.22972
	57	18.9	1.90584							57	8.7	1.82605
	58	17.1	2.5186							58	10.8	1.2
	59	19.3	1.85023							59	8.6	1.46969
	60	19.3	2.01136							60	9.7	1.7767
	61	16.6	1.97315							61	9.1	1.72208
	62	18.2	2.66583							62	8.4	1.14698
	63	16.9	1.73494							63	8.6	1.48474
	64	17.7	1.90933							64	9.2	1.21838
	65	18	2.27058							65	9.3	1.31698
	66	17.3	2.29032							66	8.5	1.22247
	67	17.6	2.06667							67	10.5	1.4004
	68	16.5	1.77169							68	9.2	1.38082
	69	18.6	1.46969							69	10.3	1.69345
	70	16.8	2.15407							70	9.9	0.91226
	71	14.8	2.2745							71	10.1	0.67412
	72	15.7	1.52789							72	7.7	1.17426
	73	16.5	1.60035							73	8.5	0.92195
	74	16.9	2.57962							74	8.8	1.43604
	75	15.2	1.31487							75	8	1.30809
	76	14.6	1.7075							76	8.5	1.00277
	77	16	2.0221							77	9.2	1.18134
	78	14.8	1.51877							78	8.8	1.47422
	79	14	2.11345							79	7.4	1.0562
	80	13.7	2.03333							80	7.5	0.96896
	81	13.8	1.98214							81	7.3	1.11604
	82	13.5	1.5438							82	9.3	1.69345
	83	14.8	1.68523							83	8.4	1.07703
	84	16.1	2.24326							84	10.1	0.73711
	85	14.7	1.61967							85	9.4	1.54344
	86	14	1.69312							86	7.7	0.89505
	87	14.2	1.65193							87	7.7	0.9551
	88	13.1	2.1							88	7	1.29099
	89	13.8	2.1848							89	7.9	1.07961
	90	13.7	1.8918							90	8.6	1.249
	91	13.2	1.61107							91	7.3	0.93155
	92	14.1	1.60174							92	9.4	1.35974
	93	13.3	1.78916							93	8	1.56347
	94	13.1	1.05883							94	9.5	1.00277
	95	13.2	1.33167							95	6.5	0.83333
	96	14.8	1.82452							96	7.3	1.07548
	97	13	2.20101							97	7.2	1.03064
	98	11.9	1.91166							98	8.1	1.1
	99	13.3	1.82605							99	8.2	1.15277
	100	13.6	1.46969							100	7.8	1.15277
		--	--								--	--
		--	--								--	--
		--	--								--	--
		--	--								--	--
		--	--								--	--
		--	--								--	--
		--	--								--	--
		--	--								--	--
		--	--								--	--
		--	--								--	--
		--	--								--	--
		--	--								--	--
