# Supplementary material for: Epac2 in midbrain dopamine neurons contributes to cocaine reinforcement via enhancement of dopamine release
Source: eLife. 2022 Aug 22;11:e80747. doi: 10.7554/eLife.80747 (PMC9436413; doi:10.7554/eLife.80747)
Supplement: Figure 7—source data 1. [file elife-80747-fig7-data1.xlsx]

## Sheet: Figure 7
	Figure 7B							Figure 7D											Figure 7E							Figure 7F
		Events/minute			Events/minute				Session	Active nose pokes				Inactive nose pokes						Session	Cocaine infusions						Cocaine (mg/kg/infusion)	mCherry				hM4D(Gi)
		Baseline	DCZ		Baseline	DCZ				mCherry		hM4D(Gi)		mCherry		hM4D(Gi)					mCherry		hM4D(Gi)					Vehicle		DCZ		Vehicle		DCZ
		12.525	10.05		5.8	6.28333				Mean	SEM	Mean	SEM	Mean	SEM	Mean	SEM				Mean	SEM	Mean	SEM				Mean	SEM	Mean	SEM	Mean	SEM	Mean	SEM
		12.125	8.18333		8.925	10.0833			1	13.125	3.84261	12.5556	3.83011	11.875	2.03924	10.4444	2.19286			1	10.125	3.0026	9.44444	2.50062			0	3.5	1.74233	5.25	1.66637	3.71429	1.37519	0.85714	0.34007
		10.625	3.53333		11.625	12.2833			2	23.5	5.89491	24.7778	4.90685	5.5	1.42678	8.33333	1.85592			2	20.625	4.81047	21.2222	4.23536			0.03125	7.25	1.7087	9.75	2.136	9.42857	1.46152	2.71429	0.4738
		11.425	8.58333		12.625	11.5			3	39.75	6.46626	29.2222	5.8991	4.75	1.23563	4.11111	1.72759			3	32.375	5.40482	25.8889	5.20802			0.0625	18	1.22474	22	1.23924	19.1429	1.73793	9.14286	1.14286
		6.25	5.1		13.225	10.5333			4	48.625	5.23019	45.7778	4.21564	4.25	0.90139	7.22222	1.05116			4	38.5	5.34188	38.6667	4.57347			0.125	24.75	2.07666	23.375	2.31407	25.1429	1.95702	13.4286	1.64544
		8.075	7.31667		6.225	7.76667			5	59.125	6.04577	49.6667	3.64768	5.125	1.23111	6.44444	1.81897			5	50	4.272	41.1111	2.67418			0.25	16.5	0.86603	18.75	1.8003	19.7143	2.2116	12.1429	1.66803
		11.875	11.8833		8.125	11.9333			6	59.875	5.3833	60.1111	4.2441	5.125	0.93422	5.66667	1.5			6	49.375	3.84493	49.7778	3.85061			0.5	9.625	0.86474	10.875	1.41973	10.5714	1.71627	7.85714	1.35275
		8.025	9.06667		13.575	14.8167			7	60.375	5.77537	63.4444	4.48489	4.75	1.06486	5.77778	1.91324			7	51.5	3.11104	52.3333	3.34581			1	5	0.46291	5.75	0.5901	5.42857	0.75142	4.14286	1.1635
		7.825	4.51667		4.925	3.73333			8	64.875	6.26623	60.5556	3.95148	5.25	0.97742	7.55556	1.74094			8	50.875	3.50223	46.5556	3.21935
		6.525	5.56667						9	63.25	4.84676	62.4444	4.30152	4.75	0.92099	4.44444	1.10694			9	52.125	3.1591	49.5556	2.82406
									10	61	6.15572	60.2222	5.6857	4.75	0.88135	7.88889	2.30003			10	50.75	3.68273	53.2222	2.49877
									11	62.75	5.23979	38	2.36878	4.77778	1.36196	4.25	0.99553			11	53.375	3.30009	34.1111	3.19287
									12	61.75	6.49107	39.3333	2.5658	4	1.09291	4.375	1.14856			12	50.75	3.963	32	2.32737
									13	65.875	6.63174	35.7778	2.10012	4.66667	1.33333	4.25	1.23563			13	49.625	3.76515	30.3333	2.19848
									14	61.625	4.45989	62.6667	4.51541	2.625	0.625	2.77778	0.77778			14	52.125	2.94253	52.1111	2.42352
									15	63.75	4.6589	62.6667	4.04489	1.5	0.56695	2	0.79931			15	50.875	2.60108	54.1111	2.68972
									16	64.25	5.42728	61.8889	5.39404	1.875	0.78916	2.11111	0.61111			16	54	2.5425	49.5556	3.05101
