# Supplementary figures and images for: Epac2 in midbrain dopamine neurons contributes to cocaine reinforcement via enhancement of dopamine release
Source: eLife journal article supplement (doi:10.7554/elife.80747), 2022-08-22

WT mice

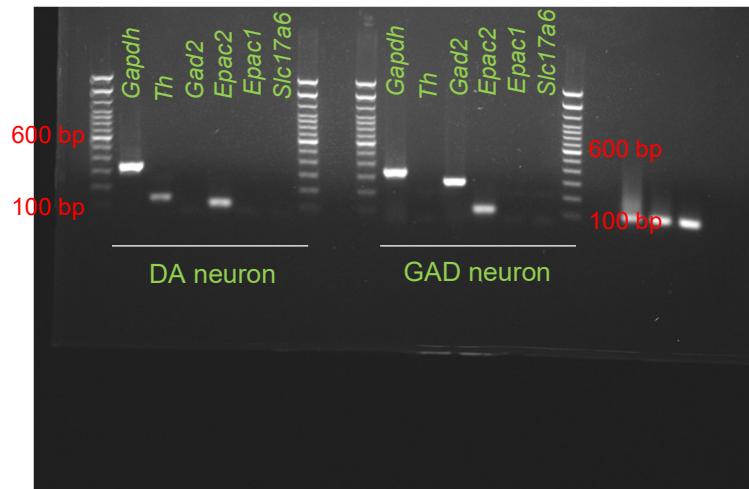

Epac2-cKO mice

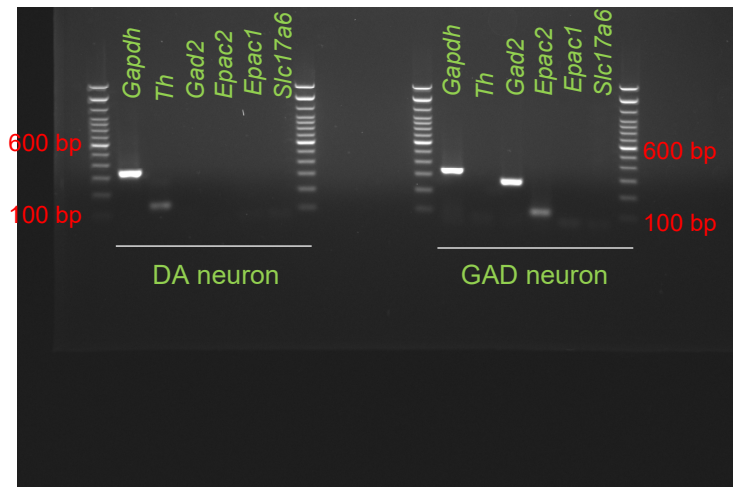

Supplement: supp [file elife-80747-supp-v1.zip]

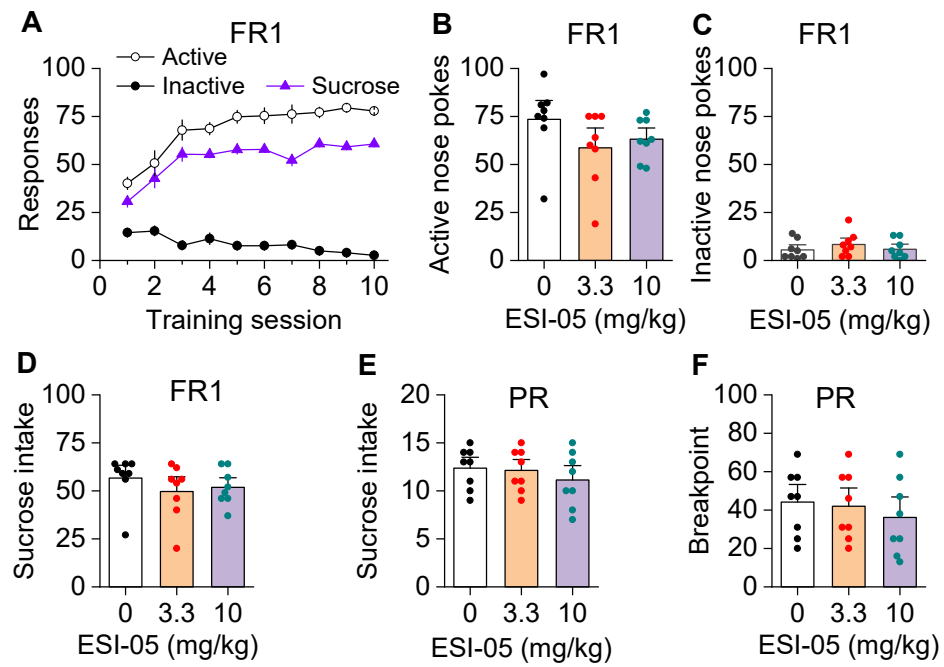

Figure 3-figure supplement 1

Supplement: supp [file elife-80747-supp-v1.zip]

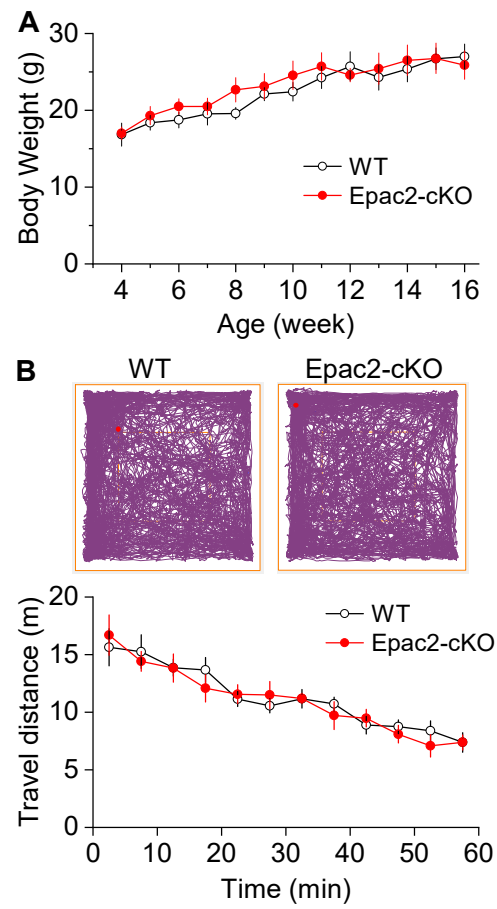

Figure 2-figure supplement 1

Supplement: supp [file elife-80747-supp-v1.zip]

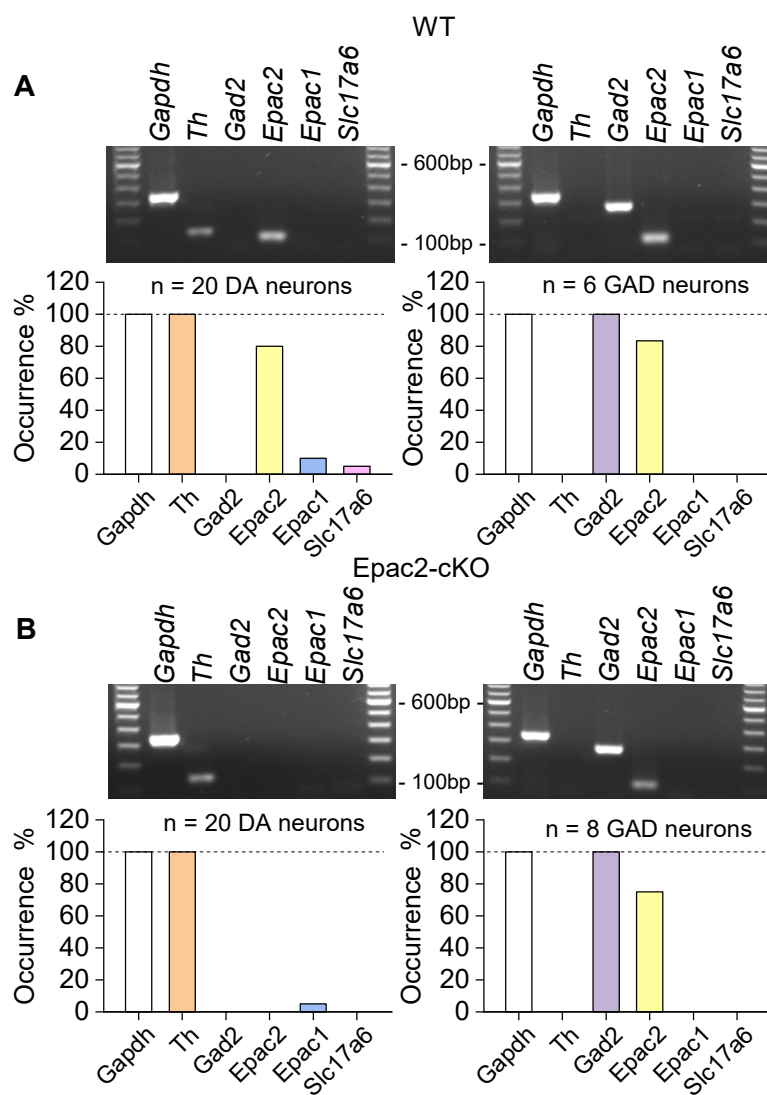

Figure 2-figure supplement 2

Supplement: supp [file elife-80747-supp-v1.zip]

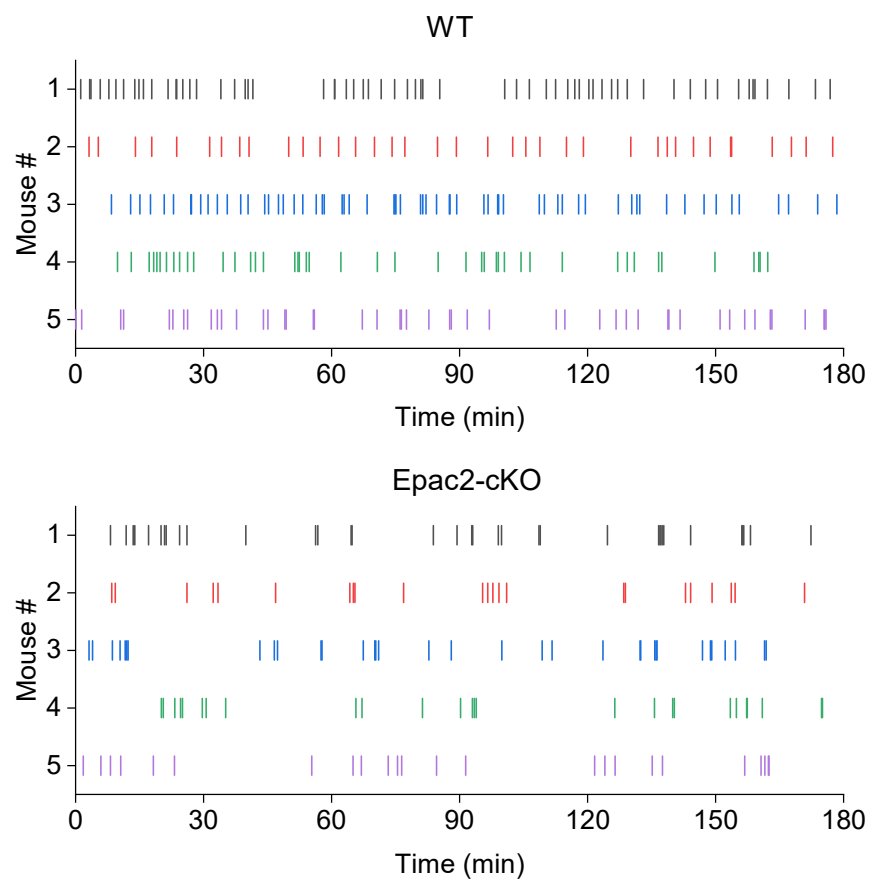

Figure 2-figure supplement 4

Supplement: supp [file elife-80747-supp-v1.zip]

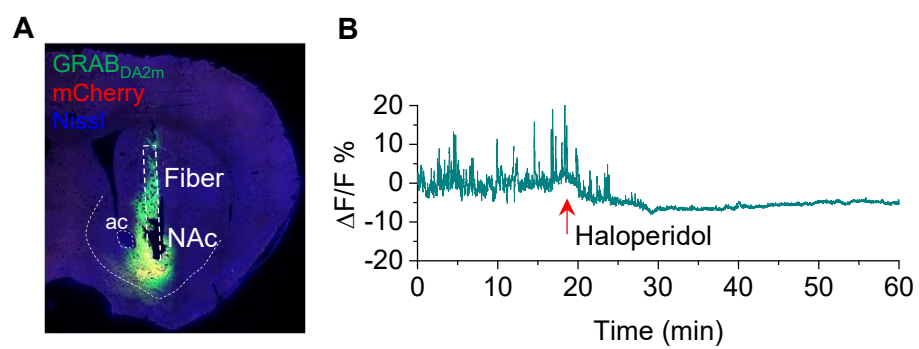

Figure 6-figure supplement 1

Supplement: supp [file elife-80747-supp-v1.zip]

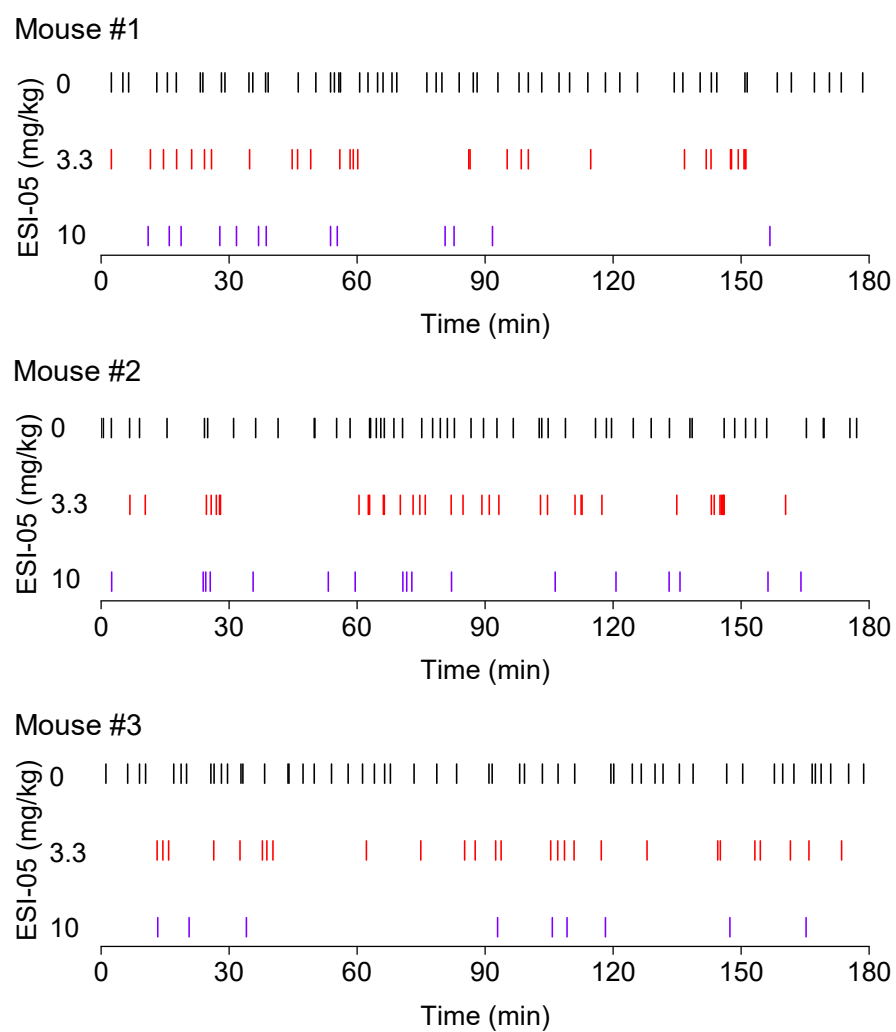

Figure 1 – figure supplement 1

Supplement: supp [file elife-80747-supp-v1.zip]

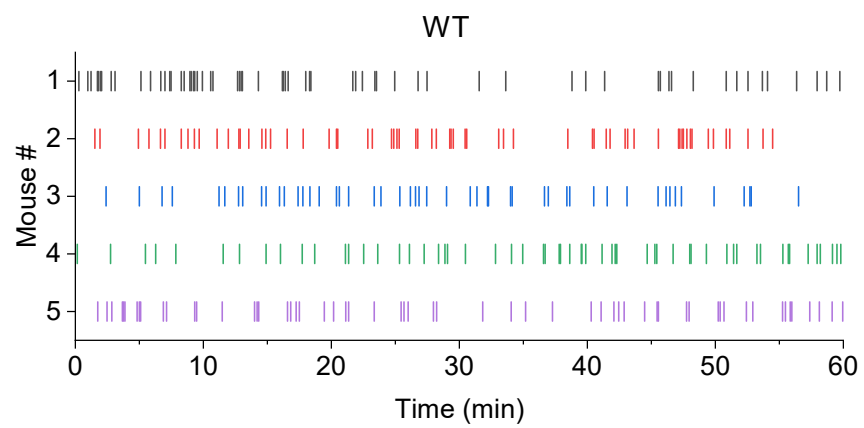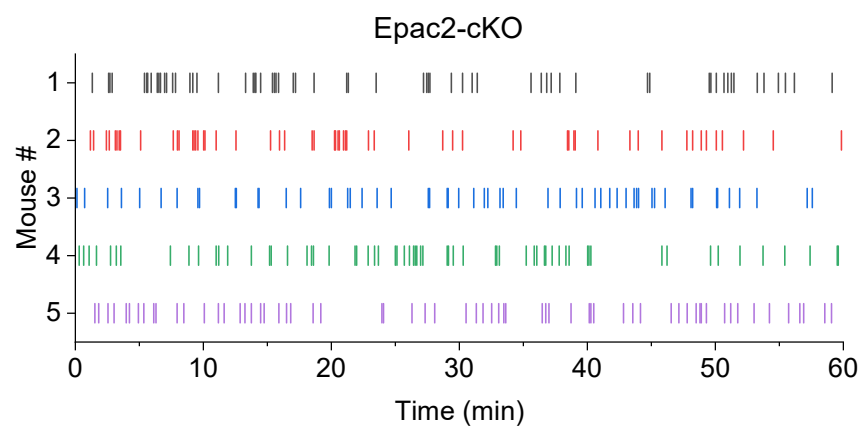

Figure 3-figure supplement 2

Supplement: supp [file elife-80747-supp-v1.zip]

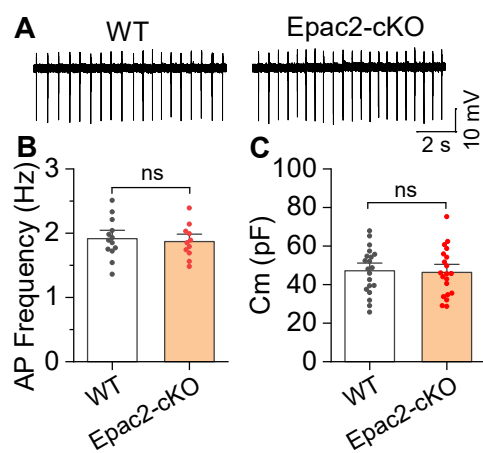

Figure 2-figure supplement 3

Supplement: supp [file elife-80747-supp-v1.zip]
